# Supplementary material for: Psychological and physiological stress and burnout among maternity providers in a rural county in Kenya: individual and situational predictors
Source: Springer Nature journal article supplement (doi:10.1186/s12889-021-10453-0), 2021-03-06
Supplement: MOESM1 [file 18937292]

**PROVIDER INFORMATION**

12 How long have you worked as a health provider?

ENTER NUMBER IN YEARS  
ENTER 0 IF LESS THAN 1 YEAR

ENTER 99 IF THEY REFUSE TO ANSWER

13 How long have you worked in this facility?

ENTER NUMBER IN YEARS  
ENTER 0 IF LESS THAN 1 YEAR

ENTER 99 IF THEY REFUSE TO ANSWER

14 What is your current position in this facility?

- 0 Doctor (Medical officer)  
 1 Doctor (Specialist/Consultant)  
 2 Clinical officer  
 3 Nurse  
 4 Midwife  
 5 Ward aid/assistant  
 6 Cleaner  
 7 Cook  
 8 Lab Technician  
 9 Blood Bank worker  
 10 Pharmacist  
 11 Other (specify) \_\_\_\_\_  
 99 Refused to answer

14b if other specify

15 (Don't ask this just select based on response above)

- 0 No  
 1 Yes

Is the respondent a clinician-i.e doctor, clinical officer, nurse/midwife?

16 How long have you been in this position?

ENTER NUMBER IN YEARS  
ENTER 0 IF LESS THAN 1 YEAR

ENTER 99 IF THEY REFUSE TO ANSWER

17 About how many days do you currently work per week?

- 1  
 2  
 3  
 4  
 5  
 6  
 7  
 99 Refused to answer

---

18 About how many hours do you currently work per day? \_\_\_\_\_

ENTER APPROXIMATE NUMBER OF HOURS BETWEEN 0 AND 24 HOURS

ENTER 99 IF THEY REFUSE TO ANSWER

---

19 In general, how satisfied are you with your job? Will you say you are very satisfied, satisfied, dissatisfied, or very dissatisfied?

- 0 Very dissatisfied
- 1 Dissatisfied
- 2 Neither satisfied nor dissatisfied
- 3 Satisfied
- 4 Very satisfied
- 99 Refused to answer

**EFFORT-REWARD IMBALANCE SCALE**

**The following items refer to how you feel about your present job. For each of the following statements, please indicate whether you strongly agree, agree, disagree or strongly disagree.**

- 20 ERI1 I have constant time pressure due to a heavy work load.  0 Strongly disagree  
 1 Disagree  
 2 Agree  
 3 Strongly agree  
 99 Refused to answer
- 
- 21 ERI2 I have many interruptions and disturbances while performing my job  0 Strongly disagree  
 1 Disagree  
 2 Agree  
 3 Strongly agree  
 99 Refused to answer
- 
- 22 ERI3 Over the past few years, my job has become more and more demanding.  0 Strongly disagree  
 1 Disagree  
 2 Agree  
 3 Strongly agree  
 99 Refused to answer
- 
- 23 ERI4 I receive the respect I deserve from my superior or some one to whom I report.  0 Strongly disagree  
 1 Disagree  
 2 Agree  
 3 Strongly agree  
 99 Refused to answer
- 
- 24 ERI5 My job promotion prospects are poor.  0 Strongly disagree  
 1 Disagree  
 2 Agree  
 3 Strongly agree  
 99 Refused to answer
- 
- 25 ERI6 I have experienced or I expect to experience an undesirable change in my work situation.  0 Strongly disagree  
 1 Disagree  
 2 Agree  
 3 Strongly agree  
 99 Refused to answer
- 
- 26 ERI7 My job security is poor.  0 Strongly disagree  
 1 Disagree  
 2 Agree  
 3 Strongly agree  
 99 Refused to answer
- 
- 27 ERI8 Considering all my efforts and achievements, I receive the respect and prestige I deserve at work.  0 Strongly disagree  
 1 Disagree  
 2 Agree  
 3 Strongly agree  
 99 Refused to answer
- 
- 28 ERI9 Considering all my efforts and achievements, my job promotion prospects are adequate.  0 Strongly disagree  
 1 Disagree  
 2 Agree  
 3 Strongly agree  
 99 Refused to answer

- 
- 29 ERI10 Considering all my efforts and achievements, my salary / income is adequate.
- 0 Strongly disagree  
 1 Disagree  
 2 Agree  
 3 Strongly agree  
 99 Refused to answer
- 
- 30 OC1 I get easily overwhelmed by time pressures at work.
- 0 Strongly disagree  
 1 Disagree  
 2 Agree  
 3 Strongly agree  
 99 Refused to answer
- 
- 31 OC2 As soon as I get up in the morning I start thinking about work problems
- 0 Strongly disagree  
 1 Disagree  
 2 Agree  
 3 Strongly agree  
 99 Refused to answer
- 
- 32 OC3 When I get home, I can easily relax and 'switch off' work.
- 0 Strongly disagree  
 1 Disagree  
 2 Agree  
 3 Strongly agree  
 99 Refused to answer
- 
- 33 OC4 People close to me say I sacrifice too much for my job.
- 0 Strongly disagree  
 1 Disagree  
 2 Agree  
 3 Strongly agree  
 99 Refused to answer
- 
- 34 OC5 Work rarely lets me go, it is still on my mind when I go to bed.
- 0 Strongly disagree  
 1 Disagree  
 2 Agree  
 3 Strongly agree  
 99 Refused to answer
- 
- 35 OC6 If I postpone something that I was supposed to do today I'll have trouble sleeping at night.
- 0 Strongly disagree  
 1 Disagree  
 2 Agree  
 3 Strongly agree  
 99 Refused to answer

**COHEN STRESS SCALE**

The following questions ask about your feelings and thoughts during **THE PAST MONTH**.

In each question, you will be asked **HOW OFTEN** you felt or thought a certain way. Although some of the questions are similar, there are small differences between them and you should treat each one as a separate question. The best approach is to answer fairly quickly. That is, don't try to count up the exact number of times you felt a particular way, but tell me the answer that in general seems the best.

For each statement, please tell me if you have had these thoughts or feelings: never, almost never, sometimes, fairly often, or very often.

**(Read all answer choices each time)**

- 36 B.1. In the past month, how often have you been upset because of something that happened unexpectedly?
- 0 Never  
 1 Almost Never  
 2 Sometimes  
 3 Fairly Often  
 4 Very Often  
 99 Refused to answer
- 
- 37 B.2. In the past month, how often have you felt unable to control the important things in your life?
- 0 Never  
 1 Almost Never  
 2 Sometimes  
 3 Fairly Often  
 4 Very Often  
 99 Refused to answer
- 
- 38 B.3. In the past month, how often have you felt nervous or stressed?
- 0 Never  
 1 Almost Never  
 2 Sometimes  
 3 Fairly Often  
 4 Very Often  
 99 Refused to answer
- 
- 39 B.4. In the past month, how often have you felt confident about your ability to handle personal problems?
- 0 Never  
 1 Almost Never  
 2 Sometimes  
 3 Fairly Often  
 4 Very Often  
 99 Refused to answer
- 
- 40 B.5. In the past month, how often have you felt that things were going your way?
- 0 Never  
 1 Almost Never  
 2 Sometimes  
 3 Fairly Often  
 4 Very Often  
 99 Refused to answer

- 
- 41 B.6. In the past month, how often have you found that you could not cope with all the things you had to do?
- 0 Never
  - 1 Almost Never
  - 2 Sometimes
  - 3 Fairly Often
  - 4 Very Often
  - 99 Refused to answer
- 
- 42 B.7. In the past month, how often have you been able to control irritations in your life?
- 0 Never
  - 1 Almost Never
  - 2 Sometimes
  - 3 Fairly Often
  - 4 Very Often
  - 99 Refused to answer
- 
- 43 B.8. In the past month, how often have you felt that you were on top of things?
- 0 Never
  - 1 Almost Never
  - 2 Sometimes
  - 3 Fairly Often
  - 4 Very Often
  - 99 Refused to answer
- 
- 44 B.9. In the past month, how often have you been angry because of things that happened that were outside of your control?
- 0 Never
  - 1 Almost Never
  - 2 Sometimes
  - 3 Fairly Often
  - 4 Very Often
  - 99 Refused to answer
- 
- 45 B.10. In the past month, how often have you felt that difficulties were piling up so high that you could not overcome them?
- 0 Never
  - 1 Almost Never
  - 2 Sometimes
  - 3 Fairly Often
  - 4 Very Often
  - 99 Refused to answer

**BURNOUT MEASURE**

**Next I am going to ask you some questions on how you feel at Work.**

**Below are a number of statements that describe different feelings that you may feel at work. Please indicate how often, in the past 30 workdays, you have felt each of the following feelings:**

**Please tell me if it is:**

- 0, Never or almost never |**
- 2, Very infrequently |**
- 3, Quite infrequently |**
- 4, Sometimes |**
- 5, Quite frequently |**
- 6, Very frequently |**
- 7, Always or almost always**

**In the past 30days how often have you felt this way at work?**

- |       |                                                       |                                                                                                                                                                                                                                                                                                                                                                       |
|-------|-------------------------------------------------------|-----------------------------------------------------------------------------------------------------------------------------------------------------------------------------------------------------------------------------------------------------------------------------------------------------------------------------------------------------------------------|
| 46    | P1. I feel tired                                      | <input type="radio"/> 0 Never or almost never<br><input type="radio"/> 1 Very infrequently<br><input type="radio"/> 2 Quite infrequently<br><input type="radio"/> 3 Sometimes<br><input type="radio"/> 4 Quite frequently<br><input type="radio"/> 5 Very frequently<br><input type="radio"/> 6 Always or almost always<br><input type="radio"/> 99 Refused to answer |
| <hr/> |                                                       |                                                                                                                                                                                                                                                                                                                                                                       |
| 47    | P2. I have no energy for going to work in the morning | <input type="radio"/> 0 Never or almost never<br><input type="radio"/> 1 Very infrequently<br><input type="radio"/> 2 Quite infrequently<br><input type="radio"/> 3 Sometimes<br><input type="radio"/> 4 Quite frequently<br><input type="radio"/> 5 Very frequently<br><input type="radio"/> 6 Always or almost always<br><input type="radio"/> 99 Refused to answer |
| <hr/> |                                                       |                                                                                                                                                                                                                                                                                                                                                                       |
| 48    | P3. I feel physically drained                         | <input type="radio"/> 0 Never or almost never<br><input type="radio"/> 1 Very infrequently<br><input type="radio"/> 2 Quite infrequently<br><input type="radio"/> 3 Sometimes<br><input type="radio"/> 4 Quite frequently<br><input type="radio"/> 5 Very frequently<br><input type="radio"/> 6 Always or almost always<br><input type="radio"/> 99 Refused to answer |

---

49 P4. I feel fed up

0 Never or almost never  
 1 Very infrequently  
 2 Quite infrequently  
 3 Sometimes  
 4 Quite frequently  
 5 Very frequently  
 6 Always or almost always  
 99 Refused to answer

---

50 P5. I feel like my "batteries" are "dead"

0 Never or almost never  
 1 Very infrequently  
 2 Quite infrequently  
 3 Sometimes  
 4 Quite frequently  
 5 Very frequently  
 6 Always or almost always  
 99 Refused to answer

---

51 P6. I feel burned out

0 Never or almost never  
 1 Very infrequently  
 2 Quite infrequently  
 3 Sometimes  
 4 Quite frequently  
 5 Very frequently  
 6 Always or almost always  
 99 Refused to answer

---

52 C7. My thinking process is slow

0 Never or almost never  
 1 Very infrequently  
 2 Quite infrequently  
 3 Sometimes  
 4 Quite frequently  
 5 Very frequently  
 6 Always or almost always  
 99 Refused to answer

---

53 C8. I have difficulty concentrating

0 Never or almost never  
 1 Very infrequently  
 2 Quite infrequently  
 3 Sometimes  
 4 Quite frequently  
 5 Very frequently  
 6 Always or almost always  
 99 Refused to answer

---

54 C9. I feel I'm not thinking clearly

0 Never or almost never  
 1 Very infrequently  
 2 Quite infrequently  
 3 Sometimes  
 4 Quite frequently  
 5 Very frequently  
 6 Always or almost always  
 99 Refused to answer



---

55 C10. I feel I'm not focused in my thinking

- 0 Never or almost never
- 1 Very infrequently
- 2 Quite infrequently
- 3 Sometimes
- 4 Quite frequently
- 5 Very frequently
- 6 Always or almost always
- 99 Refused to answer

---

56 C11. I have difficulty thinking about complex things

- 0 Never or almost never
- 1 Very infrequently
- 2 Quite infrequently
- 3 Sometimes
- 4 Quite frequently
- 5 Very frequently
- 6 Always or almost always
- 99 Refused to answer

---

57 E12. I feel I am unable to be sensitive to the needs of coworkers and patients

- 0 Never or almost never
- 1 Very infrequently
- 2 Quite infrequently
- 3 Sometimes
- 4 Quite frequently
- 5 Very frequently
- 6 Always or almost always
- 99 Refused to answer

---

58 E13. I feel I am not capable of investing emotionally in coworkers and patients

- 0 Never or almost never
- 1 Very infrequently
- 2 Quite infrequently
- 3 Sometimes
- 4 Quite frequently
- 5 Very frequently
- 6 Always or almost always
- 99 Refused to answer

---

59 E14. I feel I am not capable of being sympathetic to co-workers and patients

- 0 Never or almost never
- 1 Very infrequently
- 2 Quite infrequently
- 3 Sometimes
- 4 Quite frequently
- 5 Very frequently
- 6 Always or almost always
- 99 Refused to answer

**Heart rate variability measurement**

- 60 Now I am going to put this device on your finger while we continue with the rest of the questions. The device measures your heart rate variability, which can be used to assess your level of stress.
- 0 No  
 1 Yes  
 2 Sensor not available  
 3 Sensor not connecting

Please remain seated and still while we take the reading as movement can affect the results. We will take the reading for 5 mins.

Agreed to HRV testing?

- 
- 61 Time sensor put on respondent
-

- 
- 67 On a scale of 0 to 10, where 0 means that you don't have any of the things you need to effectively do your work, such as medicines and supplies, and 10 means you have everything you need to work with, where will you place your situation in this facility?
- 0  
 1  
 2  
 3  
 4  
 5  
 6  
 7  
 8  
 9  
 10  
 99 Refused to answer
- 
- 68 Within the last year, have you been treated by a superior in a way that was disrespectful or humiliating?  
(If they say yes, ask)  
How often will you say this has occurred?
- 0 No, never  
 1 Yes, a few times  
 2 Yes, many times  
 3 Yes, always  
 99 Refused to answer
- 
- 69 Within the last year, have you been treated by a colleague at work in a way that was disrespectful or humiliating?  
(If they say yes, ask)  
How often will you say this has occurred?
- 0 No, never  
 1 Yes, a few times  
 2 Yes, many times  
 3 Yes, always  
 99 Refused to answer
- 
- 70 Within the last year, have you been treated by a patient in a way that was disrespectful or humiliating?  
(If they say yes, ask)  
How often will you say this has occurred?
- 0 No, never  
 1 Yes, a few times  
 2 Yes, many times  
 3 Yes, always  
 99 Refused to answer
- 
- 71 Have you ever lost a mother or baby during pregnancy or childbirth?
- 0 No  
 1 Yes  
 2 Prefer not to answer
- That is a pregnant woman you were involved in caring for died, her baby was delivered stillbirth, or the mother or baby died soon after delivery?
- 
- 72 (If yes): I am sorry to hear that: Was this a maternal death, still birth, or early neonatal death?
- 0 Maternal death  
 1 Still birth  
 2 Neonatal death  
 3 Other death  
 99 Refused to answer
- 
- 73 Did this happen in the last year?
- 0 No  
 1 Yes  
 2 Prefer not to answer
- 
- 74 Have you ever had any thoughts of suicide, i.e. wanting to end you life?
- 0 No  
 1 Yes  
 2 Prefer not to answer
- 
- 75 Have you ever attempted suicide?
- 0 No  
 1 Yes  
 2 Prefer not to answer

**Health****Next, I am going to ask some general questions about your health and lifestyle**

- 93 How will you rate your health now? Will you say it is excellent, very good, good, fair, poor, or very poor?
- 0 Very Poor  
 1 Poor  
 2 Fair  
 3 Good  
 4 Very Good  
 5 Excellent  
 99 Refused to answer
- 
- 94 How often do you do moderate to vigorous exercise (such as running, fast walking, or going to the gym) ?
- 0 Almost never  
 1 Less than once a week  
 2 About 1 to 2 days a week  
 3 About 3 to 5 days a week  
 4 Almost everyday  
 99 Refused to answer
- 
- 95 How frequently do you drink alcohol
- 0 Almost never  
 1 Less than once a week  
 2 About 1 to 2 days a week  
 3 About 3 to 5 days a week  
 4 Almost everyday  
 99 Refused to answer
- 
- 96 Do you smoke?
- 0 No  
 1 Yes  
 99 Refused to answer
- 
- 97 Do you use any substances like cocaine, marijuana or other hard drugs?
- 0 No  
 1 Yes  
 99 Refused to answer
- 
- 98 What substance do you use?
- \_\_\_\_\_
- 
- 99 About how many hours do you sleep each night?
- 0 Less than 6 hours  
 1 About 6 to 8 hours  
 2 About 9 to 10 hours  
 3 More than 10 hours  
 99 Refused to answer
- 
- 100 Do you have any chronic health condition like hypertension, diabetes, HIV, arthritis, depression, etc.?
- 0 No  
 1 Yes  
 99 Refused to answer
- 
- 100 If yes: What chronic health condition do you have? (select all that apply)
- 1 Hypertension  
 2 Diabetes  
 3 HIV  
 4 Arthritis  
 5 Depression  
 8 Asthma  
 9 Other  
 99 Refused to answer

100bif other specify

\_\_\_\_\_

---

101 Are you currently taking any medications for this condition?

0 No  
 1 Yes  
 99 Refused to answer

---

102 What type of medications are you taking? (select all that apply)

1 Pain killer  
 2 Hypertension drugs  
 3 Diabetes drugs  
 4 HIV drugs  
 5 Anti-allergic  
 6 Anti-depressant  
 7 Antimalarial  
 8 Antibiotic  
 9 Sleep medicine  
 10 Asthma medicine  
 11 Other  
 99 Refused to answer

---

102bif other specify

---

---

103 Have you taken any medicine today?

0 No  
 1 Yes  
 99 Refused to answer

---

104 What medicine did you take

1 Pain killer  
 2 Hypertension drugs  
 3 Diabetes drugs  
 4 HIV drugs  
 5 Anti-allergic  
 6 Anti-depressant  
 7 Antimalarial  
 8 Antibiotic  
 9 Sleep medicine  
 10 Asthma medicine  
 11 Other  
 99 Refused to answer

---

104bif other specify

---

---

105 Was this medicine prescribed by a health care provider?

0 No  
 1 Yes  
 99 Refused to answer

**DEMOGRAPHICS:****I will end by asking you a few last questions about your self.**

166 Enter Sex of provider

- 0 Male  
 1 Female

167 How old are you ?  
(enter age in years)

---

enter 999 if they don't know

168 What is your current marital status?

- 1 Single  
 2 Partnered/Cohabiting  
 3 Married  
 4 Widowed  
 5 Divorced/Separated  
 99 Refused to answer

169 How many children do you have

---

170 What is the highest level of school you attended?

- 0 No school  
 1 Attended primary but did not finish  
 2 Primary  
 3 Post-primary/vocational  
 4 Secondary  
 5 College(middle level)  
 6 University or above  
 99 Refused to answer

171 Do you come from Migori County?

- 0 No  
 1 Yes  
 99 Refused to answer

172 How long have you lived in this county?

ENTER NUMBER IN YEARS  
ENTER 0 IF LESS THAN 1 YEAR

---

173 What is your religion?

- 0 Catholic  
 1 Methodist/Presby/Anglican  
 2 Protestant/Pentecostal  
 3 Seventh Day Adventist  
 4 Other Christian  
 5 Muslim  
 6 Other religion  
 7 No religion  
 99 Refused to answer

174 if other specify

---

- 
- 175 (SHOW RESPONDENTS A DRAWING OF A LADDER WITH 10 RUNGS, AND READ THIS THEM)
- This ladder (SHOW SHEET WITH LADDER) represents where people stand in Kenya. At the top of the ladder are the people who are the best off, those who have the most money, most education, and best jobs. At the bottom are the people who are the worst off, those who have the least money, least education, worst jobs, or no job.
- Thinking of when you were growing up (before you had your own family and before you became a health care provider), where will you place your family's social status on this ladder. Select the rung that best represents where you think your family stood on the ladder.
- 1  
 2  
 3  
 4  
 5  
 6  
 7  
 8  
 9  
 10  
 99 Refused to answer

- 
- 176 Thinking of now, where will you place your social status?  
Select the rung that best represents where you think you stand now on the ladder.
- 1  
 2  
 3  
 4  
 5  
 6  
 7  
 8  
 9  
 10  
 99 Refused to answer

- 
- 177 About how much do you earn in a month from this position (i.e. your net income)?  
(amount in KSH)  
ENTER 999 IF THEY REFUSE
- \_\_\_\_\_

**This is the end of our interview. Thank you so much for taking the time to answer our questions.**

197

Do you have any questions for me about this interview? \_\_\_\_\_

198 TIME INTERVIEW ENDED

\_\_\_\_\_

199 For study personnel: Did you enter data online in REDCAP during interview?

- 0 Yes, Data entered in REDcap during interview
- 1 No, Data entered on hard copy and entered into RED cap later

200

(Write any comments about this interview you will want to make here) \_\_\_\_\_
